# Supplementary material for: Identification of Diagnostic Metabolic Signatures in Thyroid Tumors Using Mass Spectrometry Imaging
Source: MDPI journal article supplement (doi:10.3390/molecules28155791), 2023-07-31
Supplement: s1 [file s1]

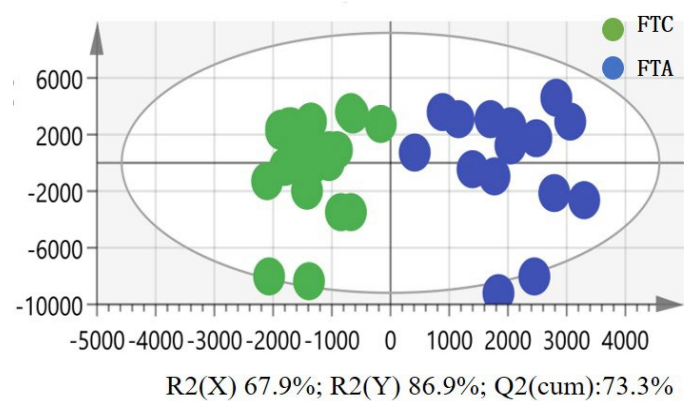

(A)

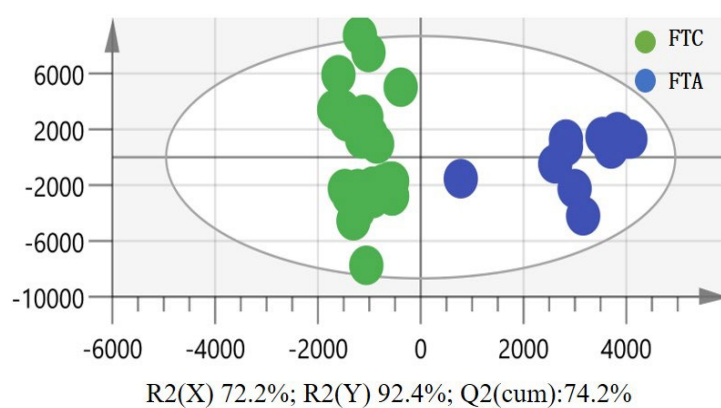

(B)

Figure S1. (A) OPLS-DA score plots based on positive AFAIDESI-MSI data from FTC and FTA.; (B) OPLS-DA score plots based on negative AFAI-MSI data from FTC and FTA.

Supplementary Table S1. The discriminated meatbolites between FTA and FTC.

| Peak ( <i>m/z</i> ) | Formula                                           | Identification                      | Ion type            |
|---------------------|---------------------------------------------------|-------------------------------------|---------------------|
| 758.5623            | C <sub>42</sub> H <sub>80</sub> NO <sub>8</sub> P | PC(34:2)                            | [M+H] <sup>+</sup>  |
| 780.5435            | C <sub>42</sub> H <sub>80</sub> NO <sub>8</sub> P | PC(34:2)                            | [M+Na] <sup>+</sup> |
| 782.5669            | C <sub>42</sub> H <sub>82</sub> NO <sub>8</sub> P | PC(34:1)                            | [M+Na] <sup>+</sup> |
| 784.5823            | C <sub>42</sub> H <sub>84</sub> NO <sub>8</sub> P | PC(34:0)                            | [M+Na] <sup>+</sup> |
| 786.5993            | C <sub>44</sub> H <sub>84</sub> NO <sub>8</sub> P | PC(36:2)                            | [M+H] <sup>+</sup>  |
| 804.5503            | C <sub>46</sub> H <sub>78</sub> NO <sub>8</sub> P | PC(38:7)                            | [M+H] <sup>+</sup>  |
| 806.5620            | C <sub>44</sub> H <sub>82</sub> NO <sub>8</sub> P | PC(36:3)                            | [M+Na] <sup>+</sup> |
| 808.581             | C <sub>44</sub> H <sub>84</sub> NO <sub>8</sub> P | PC(36:2)                            | [M+Na] <sup>+</sup> |
| 96.9677             | H <sub>3</sub> PO <sub>4</sub>                    | Phosphoric acid                     | [M-H] <sup>-</sup>  |
| 309.2038            | C <sub>20</sub> H <sub>38</sub> O <sub>2</sub>    | FA(20:1)                            | [M-H] <sup>-</sup>  |
| 283.2638            | C <sub>18</sub> H <sub>36</sub> O <sub>2</sub>    | FA(18:0)                            | [M-H] <sup>-</sup>  |
| 255.2321            | C <sub>16</sub> H <sub>32</sub> O <sub>2</sub>    | FA(16:0)                            | [M-H] <sup>-</sup>  |
| 329.2383            | C <sub>18</sub> H <sub>34</sub> O <sub>5</sub>    | 9,10,13-TriHOME                     | [M-H] <sup>-</sup>  |
| 311.2195            | C <sub>18</sub> H <sub>32</sub> O <sub>4</sub>    | 9,10-DiHODE                         | [M-H] <sup>-</sup>  |
| 215.0308            | C <sub>6</sub> H <sub>12</sub> O <sub>6</sub>     | Glucose                             | [M+Cl] <sup>-</sup> |
| 281.2457            | C <sub>18</sub> H <sub>34</sub> O <sub>2</sub>    | FA(18:1)                            | [M-H] <sup>-</sup>  |
| 279.2291            | C <sub>18</sub> H <sub>32</sub> O <sub>2</sub>    | FA(18:2)                            | [M-H] <sup>-</sup>  |
| 121.0279            | C <sub>7</sub> H <sub>6</sub> O <sub>2</sub>      | Hydroxybenzaldehyde                 | [M-H] <sup>-</sup>  |
| 327.2345            | C <sub>22</sub> H <sub>32</sub> O <sub>2</sub>    | FA(22:6)                            | [M-H] <sup>-</sup>  |
| 293.2008            | C <sub>18</sub> H <sub>30</sub> O <sub>3</sub>    | 11-oxo-(7E,9E)-octadecadienoic acid | [M-H] <sup>-</sup>  |
